# Supplementary material for: Neutralizing Antibodies in COVID-19 Serum from Tatarstan, Russia
Source: MDPI journal article supplement (doi:10.3390/ijms241210181), 2023-06-15
Supplement: s1 [file s1]

Supplementary Table S1. Inhibition rate of neutralizing antibodies in COVID-19 patients.

| <b>Inhibition rate of neutralizing antibodies in Fatal vs Non-fatal COVID-19 (81 patients)</b>                            |             |             |         |
|---------------------------------------------------------------------------------------------------------------------------|-------------|-------------|---------|
|                                                                                                                           | Fatal       | Non-fatal   | P value |
| Omicron Neutralizing antibodies, %                                                                                        | 16.30±30.12 | 28.15±37.34 | 0.28    |
| Wuhan Neutralizing antibodies, %                                                                                          | 35.20±48.20 | 43.53±41.50 | 0.56    |
| <b>Inhibition rate of neutralizing antibodies in severe COVID-19 (27 patients)</b>                                        |             |             |         |
|                                                                                                                           | Fatal       | Non-fatal   | P value |
| Omicron Neutralizing antibodies, %                                                                                        | 17.47±30.90 | 6.37±22.98  | 0.22    |
| Wuhan Neutralizing antibodies, %                                                                                          | 35.20±48.20 | 17.93±40.10 | 0.70    |
| <b>Inhibition rate of neutralizing antibodies in all patients receiving with/without olokizumab (81 patients)</b>         |             |             |         |
|                                                                                                                           | -           | +           | P value |
| Omicron Neutralizing antibodies, %                                                                                        | 31.46±39.00 | 20.04±32.46 | 0.21    |
| Wuhan Neutralizing antibodies, %                                                                                          | 49.58±41.64 | 33.49±41.07 | 0.25    |
| <b>Inhibition rate of neutralizing antibodies in COVID-19 patients in patients with different ethnicity (81 patients)</b> |             |             |         |
|                                                                                                                           | Russian     | Tatar       | P value |
| Omicron Neutralizing antibodies, %                                                                                        | 26.13±36.80 | 25.84±36.23 | 0.97    |
| Wuhan Neutralizing antibodies, %                                                                                          | 40.11±42.50 | 44.78±41.83 | 0.97    |

N – number of patients; % - percent from patients included into the group.

Supplementary Table S2. Frequency of neutralizing antibodies detection in COVID-19 patients with and without olokizumab treatment.

| All COVID-19 samples (81 patients)     |          |          |                             |                                      |          |         |
|----------------------------------------|----------|----------|-----------------------------|--------------------------------------|----------|---------|
| Omicron Neutralizing antibodies, n (%) |          |          |                             | Wuhan Neutralizing antibodies, n (%) |          |         |
| olokizumab                             | presence | absence  | p value (Fisher exact test) | presence                             | absence  | p value |
| -                                      | 18 (42%) | 25 (58%) | 0.487                       | 18 (64%)                             | 10 (36%) | 0.257   |
| +                                      | 11 (28%) | 28 (72%) |                             | 8 (38%)                              | 13 (6%)  |         |
| Mild COVID-19 (24 patients)            |          |          |                             |                                      |          |         |
| Omicron Neutralizing antibodies, n (%) |          |          |                             | Wuhan Neutralizing antibodies, n (%) |          |         |
| olokizumab                             | presence | absence  | p value (Fisher exact test) | presence                             | absence  | p value |
| -                                      | 5 (24%)  | 16 (76%) | 1                           | 5 (56%)                              | 4 (44%)  | 1       |
| +                                      | 1 (33%)  | 2 (67%)  |                             | 1 (100%)                             | 0 (0%)   |         |
| Moderate COVID-19 (30 patients)        |          |          |                             |                                      |          |         |
| Omicron Neutralizing antibodies, n (%) |          |          |                             | Wuhan Neutralizing antibodies, n (%) |          |         |
| olokizumab                             | presence | absence  | p value (Fisher exact test) | presence                             | absence  | p value |
| -                                      | 11 (65%) | 6 (35%)  | 0.711                       | 11 (65%)                             | 6 (35%)  | 0.471   |
| +                                      | 7 (54%)  | 6 (46%)  |                             | 6 (50%)                              | 6 (50%)  |         |
| Severe COVID-19 (27 patients)          |          |          |                             |                                      |          |         |
| Omicron Neutralizing antibodies, n (%) |          |          |                             | Wuhan Neutralizing antibodies, n (%) |          |         |
| olokizumab                             | presence | absence  | p value (Fisher exact test) | presence                             | absence  | p value |
| -                                      | 1 (25%)  | 3 (75%)  | 1                           | 1 (50%)                              | 1 (50%)  | 1       |
| +                                      | 4 (17%)  | 19 (83%) |                             | 2 (25%)                              | 6 (75%)  |         |

N – number of patients; % - percent from patients in each group.

P values were calculated using exact Fisher test with BH correction.

Supplementary Table S3. Frequency of COVID-19 diagnosis in patients depending on ethnicity

|                         | Russian  | Tatar    | P value                   |
|-------------------------|----------|----------|---------------------------|
| Mild COVID-19 n (%)     | 10 (42%) | 14 (58%) | Mild vs. Moderate: 0.59   |
| Moderate COVID-19 n (%) | 15 (50%) | 15 (50%) | Mild vs. Severe: 0.39     |
| Severe COVID-19 n (%)   | 8 (30%)  | 19 (70%) | Moderate vs. Severe: 0.18 |

N – number of patients; % - percent from all 81 patients included into this study;  
P values were calculated using exact Fisher test with BH correction.

Supplementary Table S4. Frequency of anti-SARS-CoV-2 neutralizing antibodies detection in COVID-19 patients by ethnicity

| All COVID-19 samples (81 patients)     |          |          |         |                                      |          |         |
|----------------------------------------|----------|----------|---------|--------------------------------------|----------|---------|
| Omicron Neutralizing antibodies, n (%) |          |          |         | Wuhan Neutralizing antibodies, n (%) |          |         |
| Ethnicity                              | presence | absence  | p value | presence                             | absence  | p value |
| Russian                                | 12 (36%) | 21 (64%) | 1       | 11 (50%)                             | 11 (50%) | 0.581   |
| Tatar                                  | 17 (35%) | 31 (65%) |         | 17 (59%)                             | 12 (41%) |         |
| Mild COVID-19 (24 patients)            |          |          |         |                                      |          |         |
| Omicron Neutralizing antibodies, n (%) |          |          |         | Wuhan Neutralizing antibodies, n (%) |          |         |
| Ethnicity                              | presence | absence  | p value | presence                             | absence  | p value |
| Russian                                | 3 (30%)  | 7 (70%)  | 0.665   | 3 (50%)                              | 3 (50%)  | 1       |
| Tatar                                  | 3 (21%)  | 11 (79%) |         | 3 (50%)                              | 3 (50%)  |         |
| Moderate COVID-19 (30 patients)        |          |          |         |                                      |          |         |
| Omicron Neutralizing antibodies, n (%) |          |          |         | Wuhan Neutralizing antibodies, n (%) |          |         |
| Ethnicity                              | presence | absence  | p value | presence                             | absence  | p value |

|                                        |          |          |                                      |          |         |         |
|----------------------------------------|----------|----------|--------------------------------------|----------|---------|---------|
| Russian                                | 7 (47%)  | 8 (53%)  | 0.665                                | 7 (50%)  | 7 (50%) | 0.462   |
| Tatar                                  | 11 (73%) | 4 (27%)  |                                      | 10 (67%) | 5 (33%) |         |
| Severe COVID-19 (27 patients)          |          |          |                                      |          |         |         |
| Omicron Neutralizing antibodies, n (%) |          |          | Wuhan Neutralizing antibodies, n (%) |          |         |         |
| Ethnicity                              | presence | absence  | p value                              | presence | absence | p value |
| Russian                                | 2 (25%)  | 6 (75%)  | 0.616                                | 1 (25%)  | 3 (75%) | 1       |
| Tatar                                  | 3 (16%)  | 16 (84%) |                                      | 2 (33%)  | 4 (67%) |         |

N – number of patients; % - percent from patients in each group;  
P values were calculated using exact Fisher test with BH correction.
